# Supplementary material
Source: PubMed Central journal article supplement (PMC7398704)

**Figure S1**

**a**

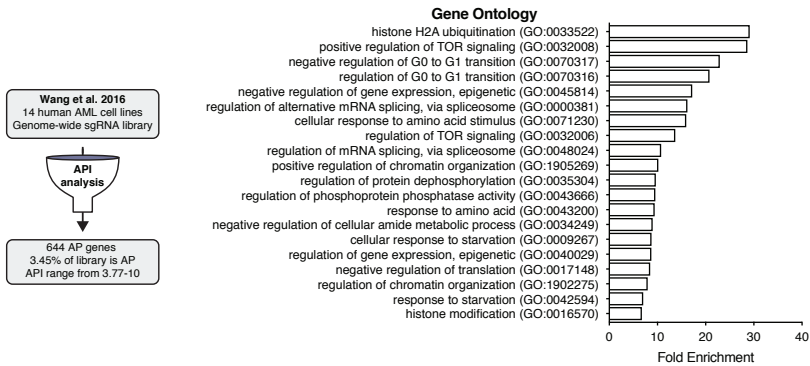

**b**

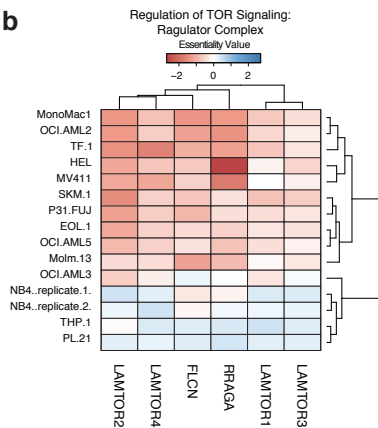

**c**

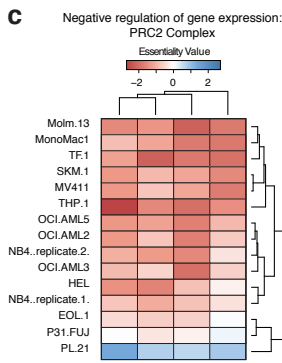

**d**

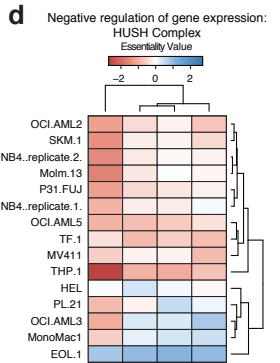

**e**

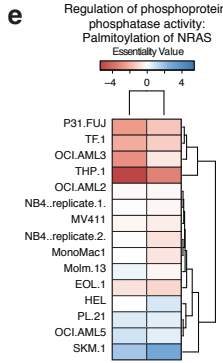

**f**

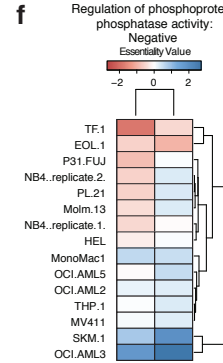

**g**

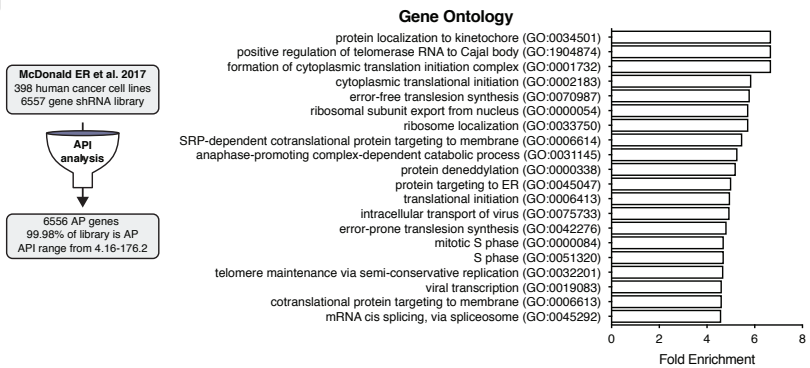

**h**

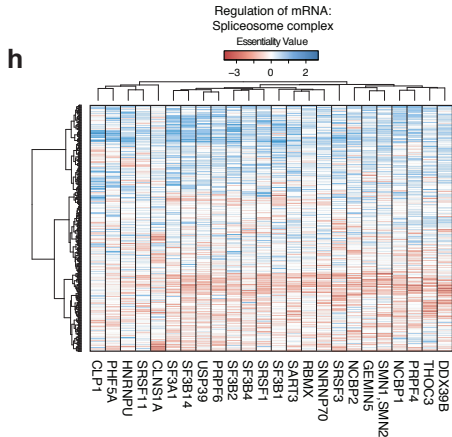

**i**

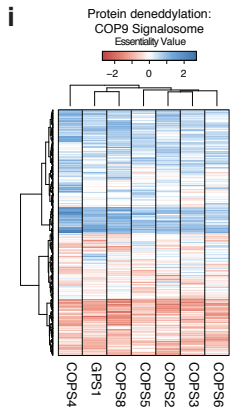

**j**

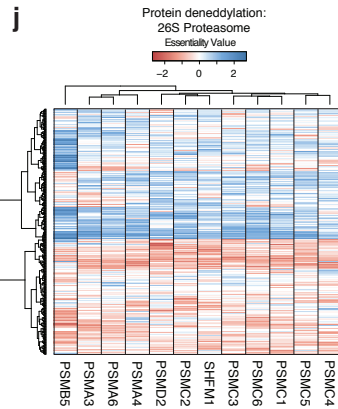

**k**

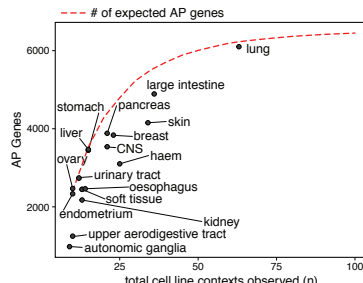

**Figure S2**

**a**

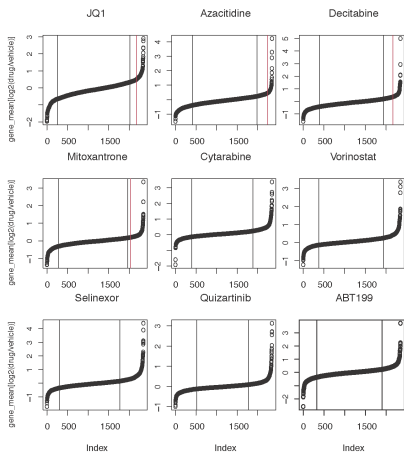

**b**

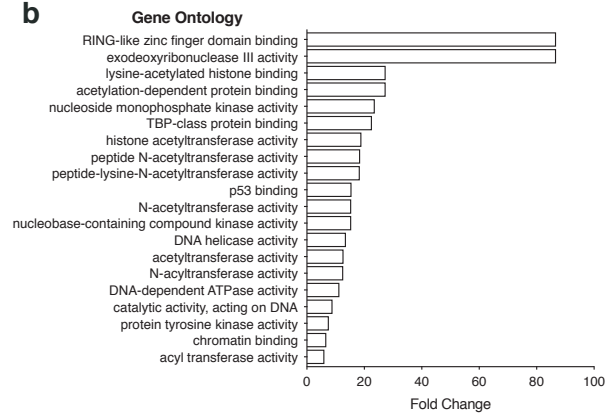

**c**

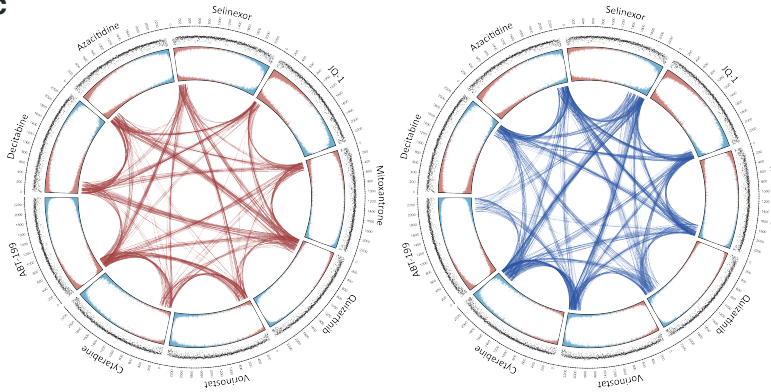

**d**

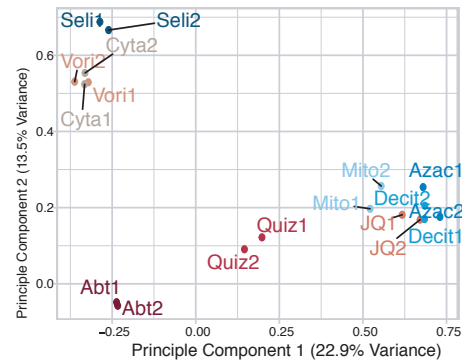

**e**

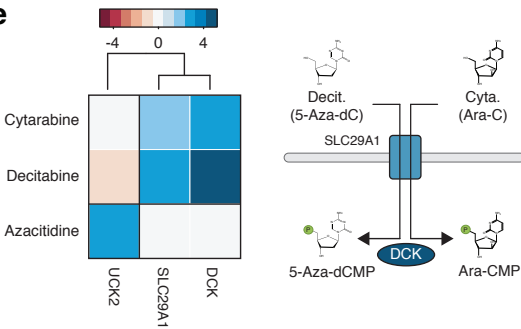

**f**

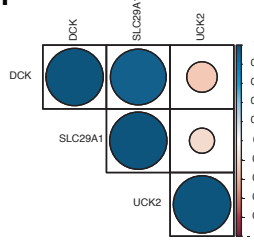

**g**

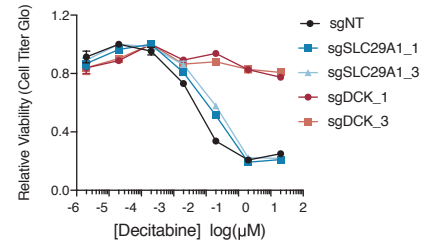

**h**

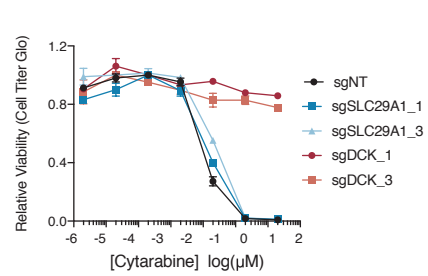

**i**

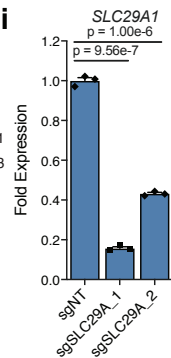

**j**

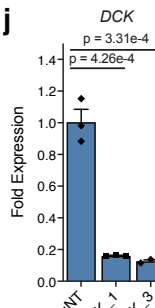

**Figure S3**

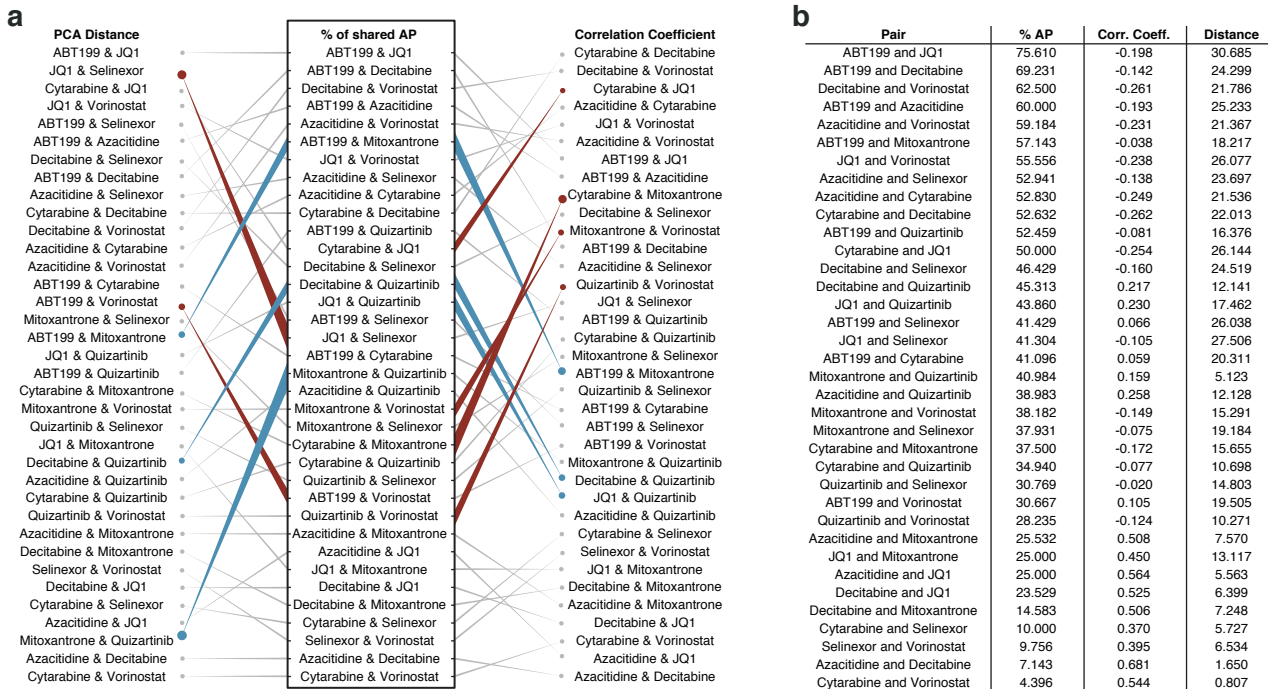

**Figure S4**

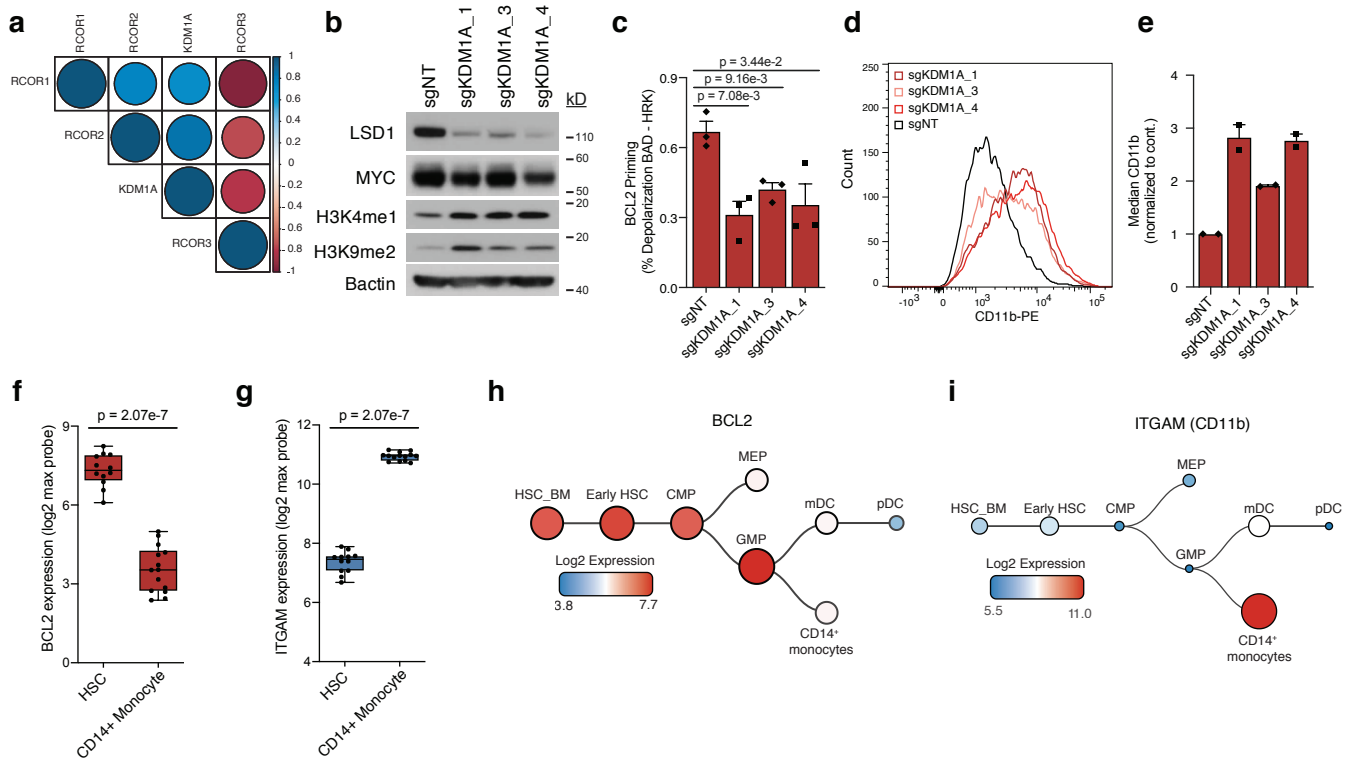

**Figure S5**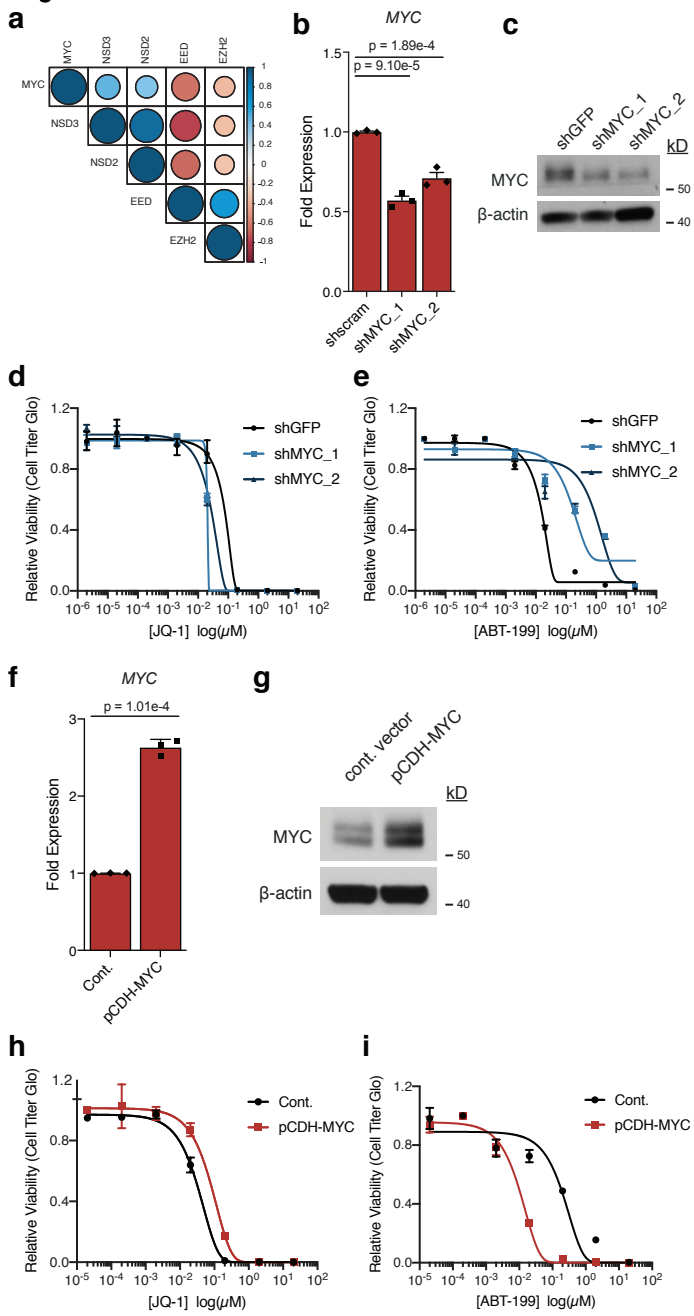

**Figure S6**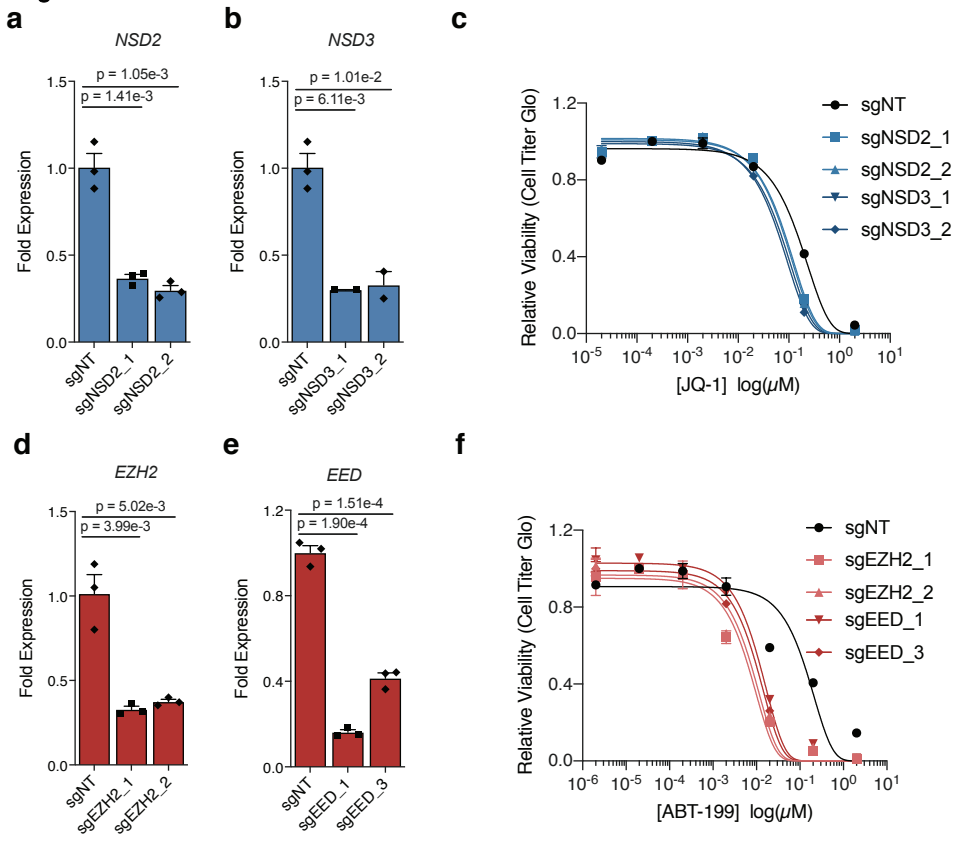

**Figure S7**

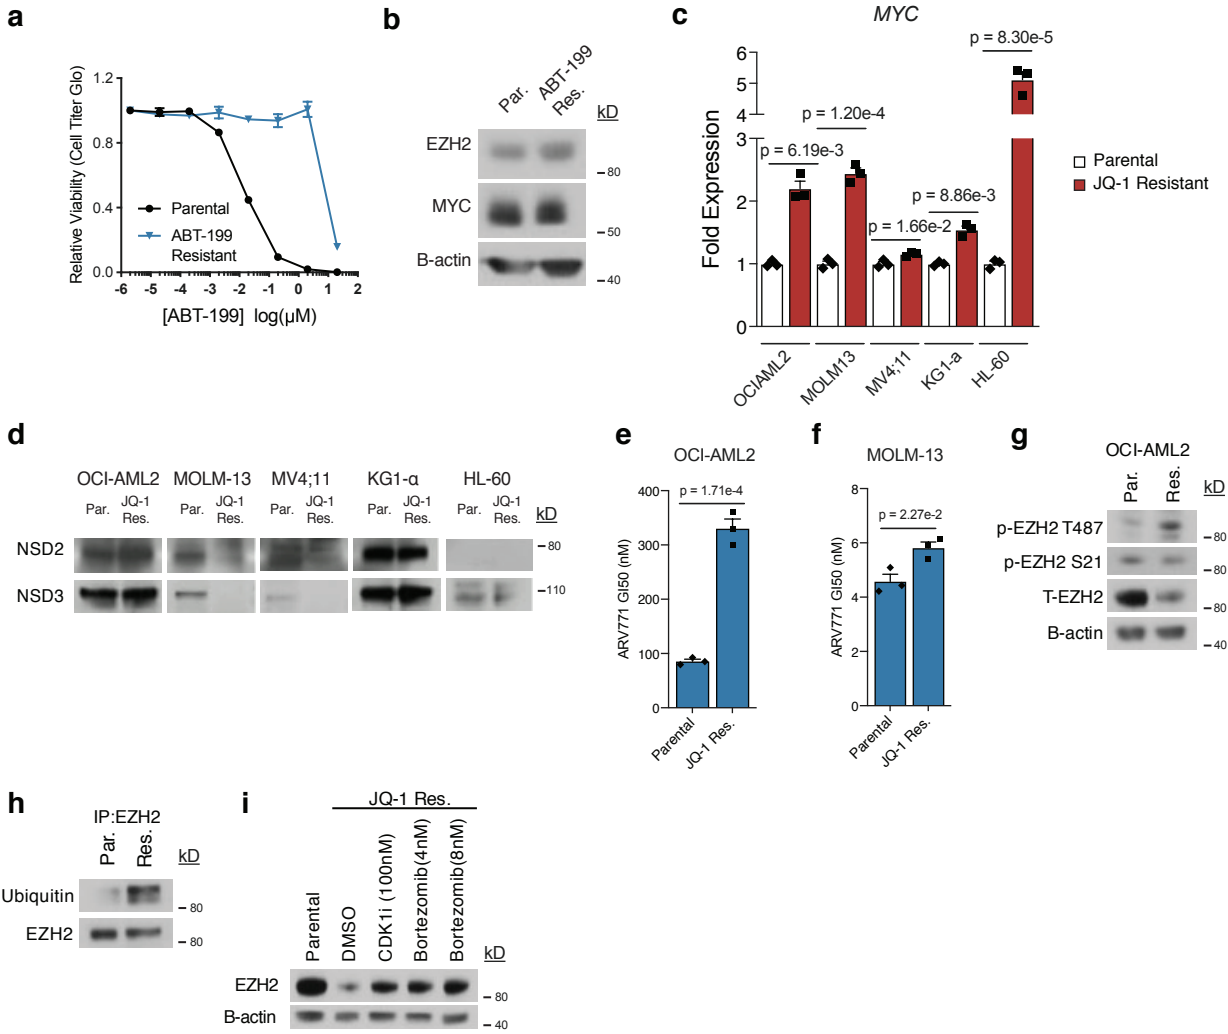

**Figure S8**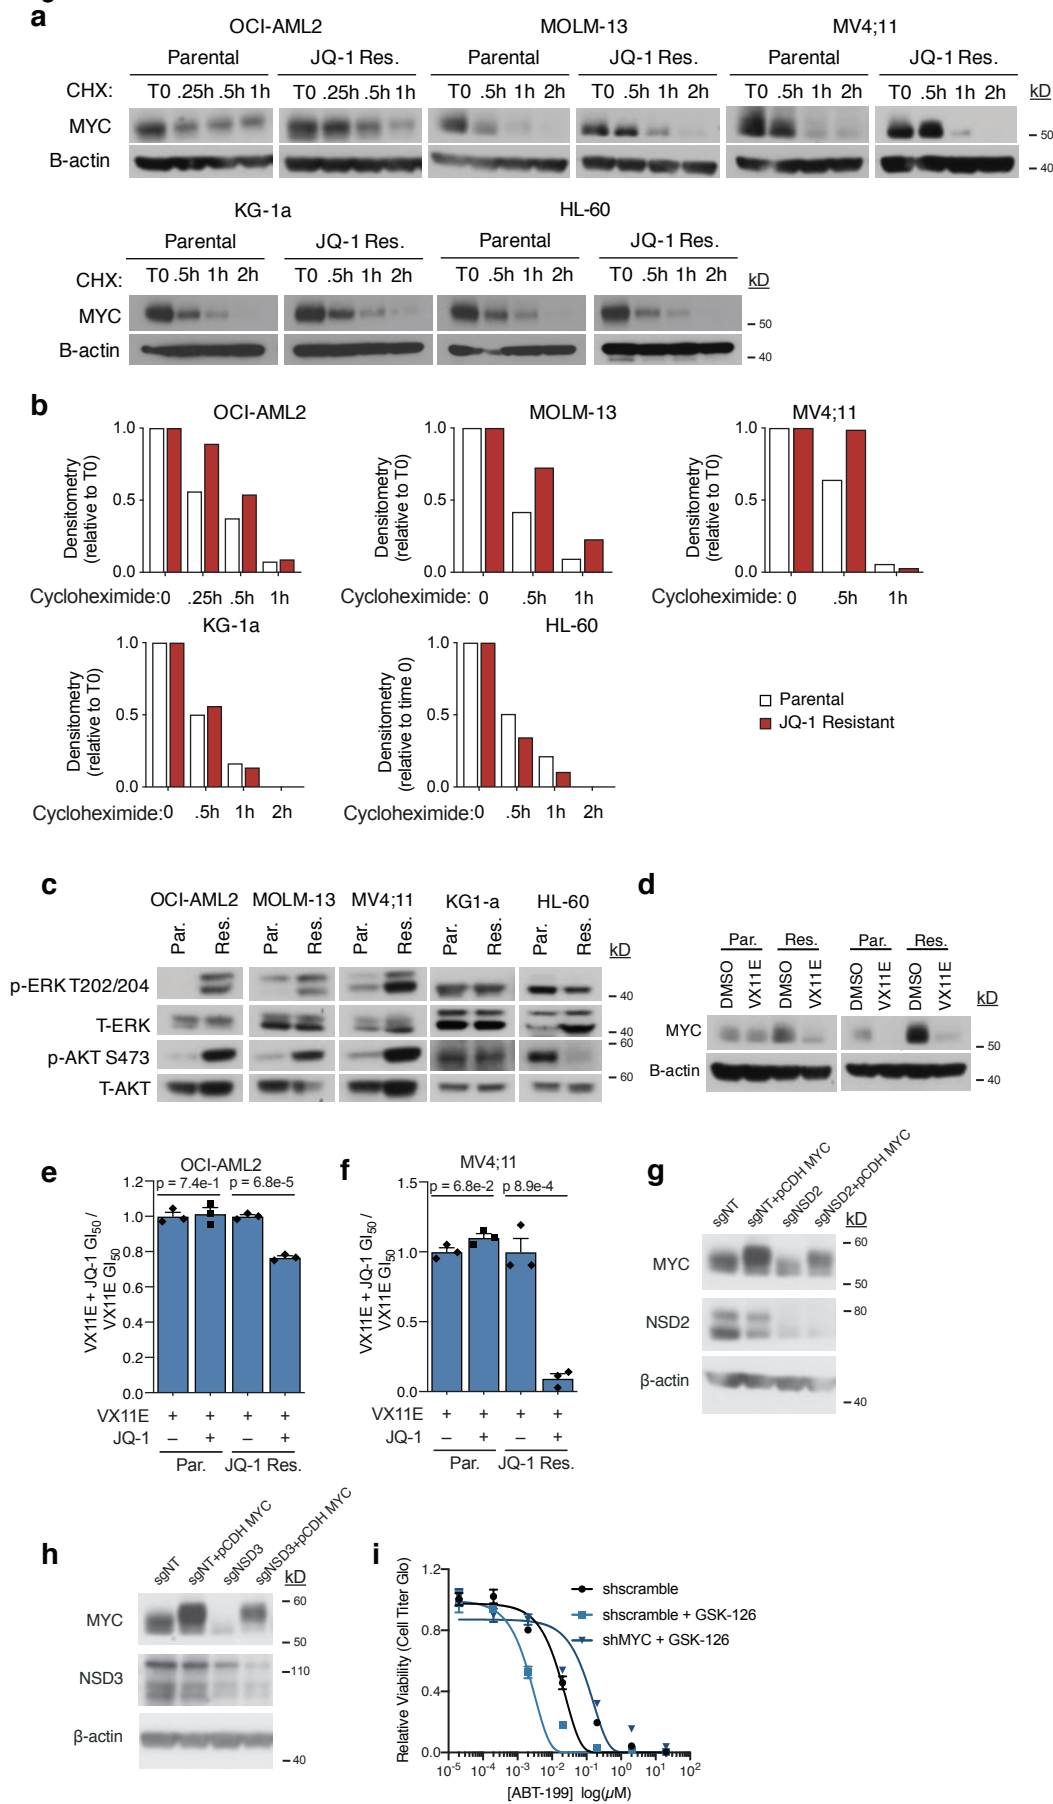



**Figure S9**

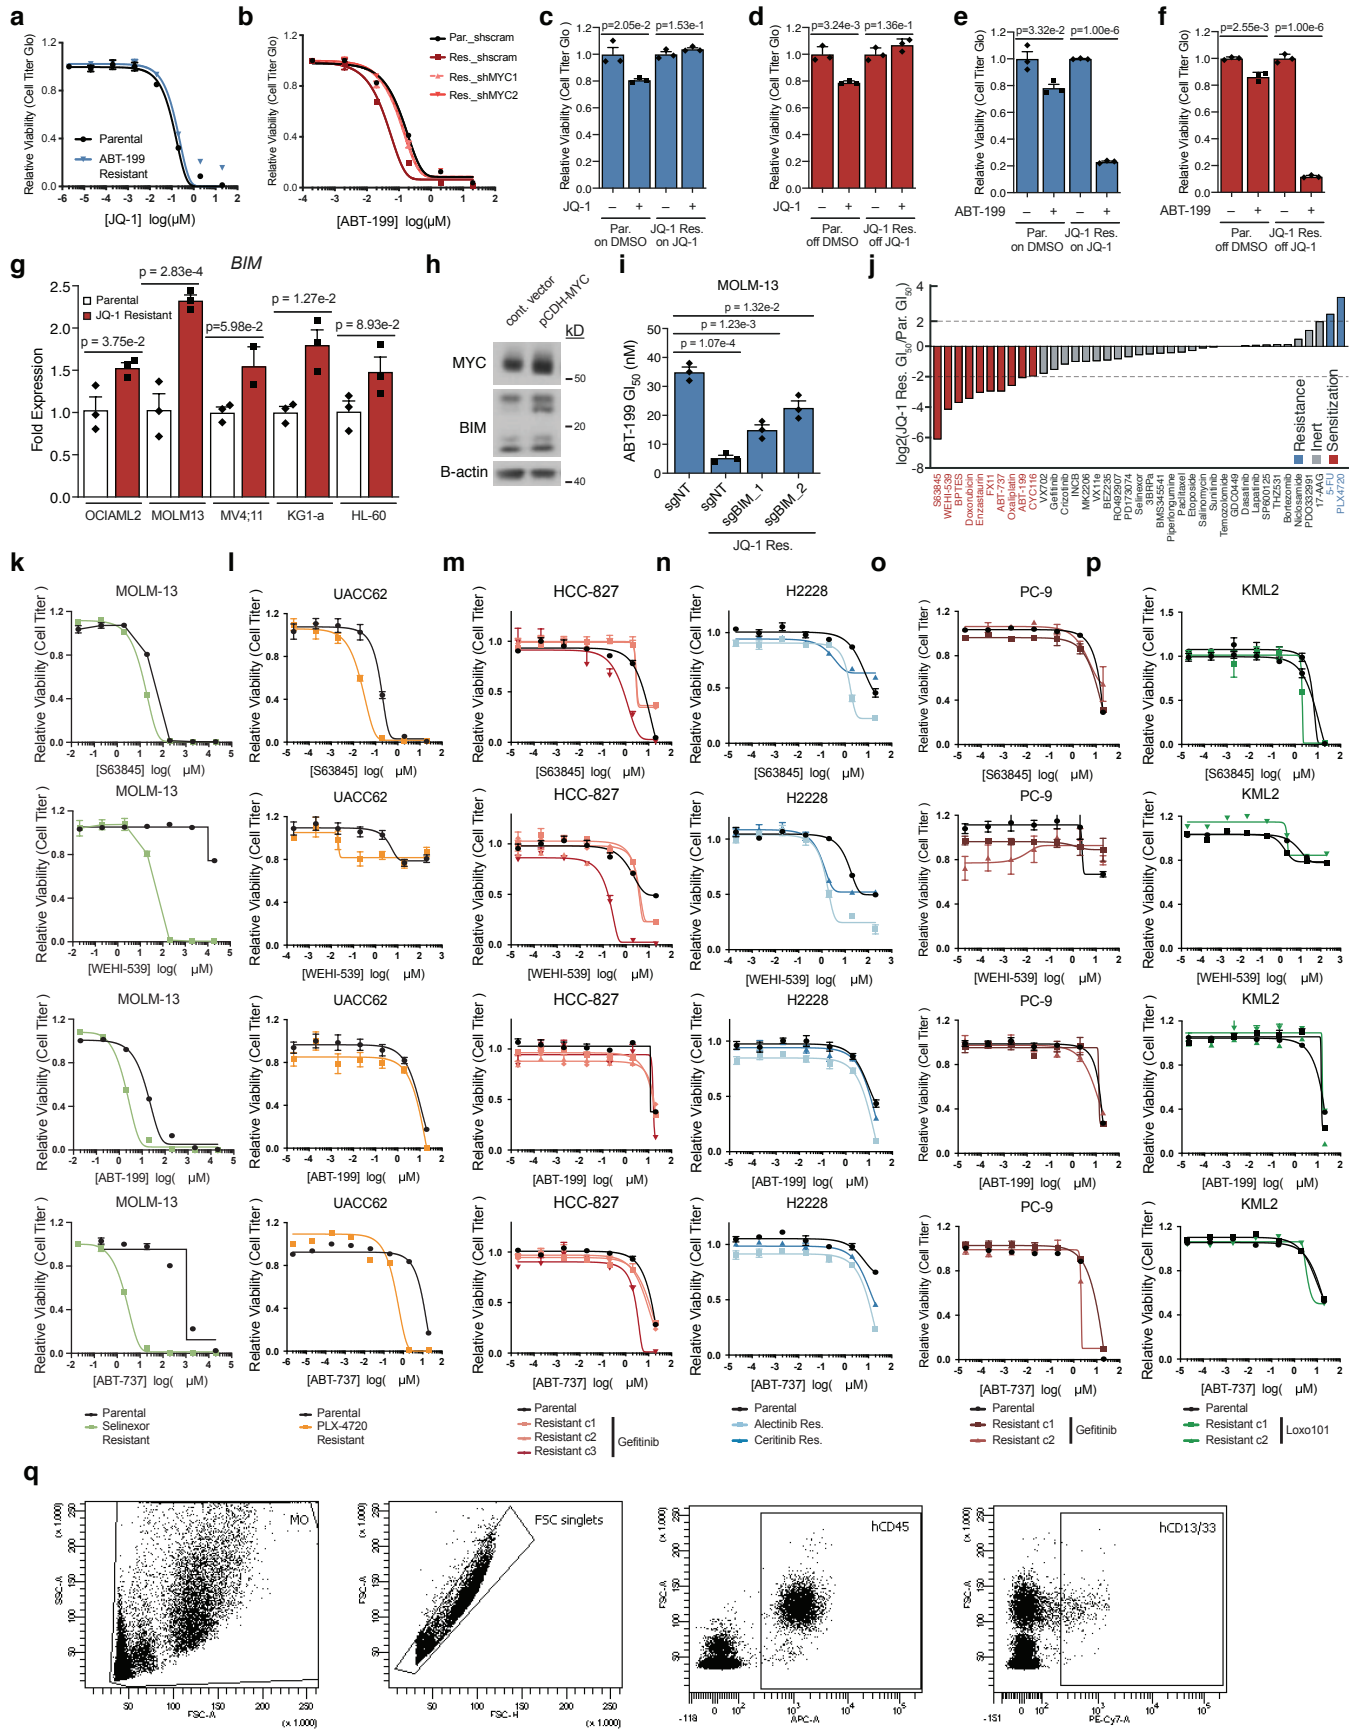

Supplement: NIHMS1600203-supplement-Supplementary_Figures.pdf [file NIHMS1600203-supplement-Supplementary_Figures.pdf]
